# Supplementary material for: Rooted, resourced and connected: stakeholder perspectives on involvement in injury care policy and practice in Ghana, Pakistan, Rwanda, and South Africa - is consensus achievable?
Source: Research Square preprint supplement (doi:10.21203/rs.3.rs-6350661/v1), 2025-05-09
Supplement: Supplementary file 1 [file 11ef68dd2c21d13494725e33.docx]

## APPENDICES

### APPENDIX 1 – description of the policy contexts for study countries

Rwanda is a low-income country in East Africa with a population of 13 million. Trauma accounts for a considerable burden, with 10% of disability-adjusted life years (DALYs) and 9% of all deaths attributed to traumatic incidents [1]. While Rwanda has clearly laid out structures and plans to prevent injuries and care for patients through a decentralised model, significant barriers to equitable access to care exist. Despite high health insurance coverage, out-of-pocket costs limit access, especially for the poorest. Additionally, while primary healthcare delivery and outcomes have improved significantly, access to and quality of tertiary, including surgical, care remain inadequate [2].

Ghana, a lower middle-income country in West Africa with a population of 33 million, faces a significant challenge in accurately quantifying the prevalence of trauma-related deaths and DALYs, with trauma accounting for an estimated 8% of deaths and 7% of DALYs [3]. Despite long term policy support and recognition for injury care, greater implementation of and investment in injury prevention and care systems is needed [4, 5]. High rate of out-of-pocket (OOP) health expenditure, disproportionately affecting those on the lowest income, hinders access to trauma care for those most in need [6].

Pakistan is a lower-middle income country with a population of 230 million and the highest urbanisation rate in South Asia [7]. Comparing to the other four countries in the study, Pakistan has the highest OOP expenditure for health no Universal Health Coverage (UHC) in place. Injuries are estimated to cause 7% of deaths, with. [3, 8]. High demand and poor supply results in patients turning to private services, which rely on health insurance or out-of-pocket payments. The lack of comprehensive data on trauma epidemiology adds to the difficulties in developing evidence-based interventions and policies.

South Africa is an upper-middle income country with a population of 61 million. High rate of trauma rate is estimated to cause to 13% of deaths, mainly from interpersonal violence [9]. Substance abuse is also widespread, with 15% of the population estimated to use drugs regularly. Substance use is linked to many forms of crime and violence, suicide, HIV/AIDS, and premature death, particularly among youths. Despite high proportion of the population being uninsured and dependent on the public health system, the majority of health care resources are in private sector [10].

References

1. Jamison, D.T., et al., *Universal health coverage and intersectoral action for health: key messages from Disease Control Priorities, 3rd edition.* Lancet, 2018. **391**(10125): p. 1108-1120.

2. National Institute of Statistics of Rwanda (NISR) [Rwanda], et al., *Rwanda Demographic and Health Survey 2019-20 Final Report.* 2021.

3. *Institute for Health Metrics and Evaluation. The Global Burden of Disease* [cited 2020; Available from: <http://www.healthdata.org/gbd>.

4. Mesic, A., et al., *Factors Contributing to and Reducing Delays in the Provision of Adequate Care in Ghana: A Qualitative Study of Trauma Care Providers.* World J Surg, 2022. **46**(11): p. 2607-2615.

5. Ohene, S.A., Y. Tettey, and R. Kumoji, *Injury-related mortality among adolescents: findings from a teaching hospital's post mortem data.* BMC Res Notes, 2010. **3**: p. 124.

6. Aidam, P.W., E. Nketiah-Amponsah, and R. Kutame, *The effect of health insurance on out-of-pocket payments, catastrophic expenditures and healthcare utilization in Ghana: case of ga south municipality.* Journal of Self-Governance and Management Economics, 2016. **4**(3): p. 42.

7. World Bank, *World Population - Pakistan* 2021.

8. *The World Bank. World bank indicators.* [cited 2021; Available from: <https://data.worldbank.org/>.

9. Prinsloo, M., et al., *Estimating the changing burden of disease attributable to interpersonal violence in South Africa for 2000, 2006 and 2012.* South African medical journal = Suid-Afrikaanse tydskrif vir geneeskunde, 2022. **112**(8): p. 693-704.

10. Morudu, P. and U. Kollamparambil, *Health shocks, medical insurance and household vulnerability: Evidence from South Africa.* PLOS ONE, 2020. **15**(2): p. e0228034.

### APPENDIX 2 – workshop agenda

Facilitator/workshop guide for individual stakeholder group workshops

To achieve meaningful outputs will require orientation of the groups and good facilitation of the working group discussions to ensure that the outputs are achieved in the timeframe.

Facilitators should note that patients/community members and healthcare workers should focus on barriers to themselves being involved in policymaking. Whereas policymakers should be asked about barriers to other people being involved in their policymaking.

*(note this is a detailed discussion guide, the research assistants running the study will be fluent in English and local languages, and will translate discussion points, where needed, for participants)*

*Please make sure that all participants consented to take part before beginning the workshop*

Overview

DAY 1: INVOLVEMENT IN POLICY: YOUR NEEDS, YOUR PRIORITIES (RQ 1)

| Time | Session | Format | Leads |
| --- | --- | --- | --- |
| 0800 - 0900 | Introduction | Presentation, Q+A |  |
| 0900 - 1100 | Part 1: Needs for Involvement | Roundtable 1  Plenary 1 |  |
| *1100 - 1130* | *Coffee* |  |  |
| 1130 - 1330 | Part 2: Mechanisms of Involvement | Roundtable 2  Plenary 2 |  |
| *1330 - 1430* | *Lunch* |  |  |
| 1430 - 1630 | Part 3: Barriers to involvement | Roundtable 3  Plenary 3 |  |
| *1630 - 1700* | *Coffee* |  |  |
| 1700 - 1730 | Day 2 outline, summary, thanks and close | Presentation, Q+A |  |
|  |  |  |  |

DAY 2: WORKING TOGETHER TO EMBED RESEARCH IN POLICY*

| Time | Session | Format | Leads |
| --- | --- | --- | --- |
| 0900-0930 | Introduction and recap Day 1 | Presentation, Q+A |  |
| 0930-1100 | Part 1: Supporting involvement | Roundtable 1  Plenary 1 |  |
| *1100 - 1130* | *Coffee* |  |  |
| 1130 – 1330 | Part 2: Working together to embed research in policy | Roundtable 2  Plenary 2 |  |
| *1330 - 1430* | *Lunch* |  |  |
| 1430 - 1630 | Part 3: Nominating representatives for multistakeholder engagement | Roundtable 3  Plenary 3 |  |
| *1630 - 1700* | *Coffee* |  |  |
| 1700 - 1730 | Next steps, summary, thanks and close | Presentation, Q+A |  |

*Day 2 is less structured than day 1. It will take the roundtable/plenary format, revisiting, verifying and amplifying the outputs from Day 1 but without rounds of voting. The structure and format are intended to support participant involvement and ownership, and participants will be invited to lead discussions where acceptable and appropriate.

DAY 1: Workshop schedule (Individual Stakeholder Groups)

Introduction to research (brief) and workshop (detailed) (PRESENTATION and Q&A)

*Brief introduction of the whole research plan (recorded or in person from PIs)*

This plenary group discussion is to orient participants to the aims of the workshop, as outlined in the objectives and to describe what the research team mean by policy and contributing to policy. To also describe why the participants were invited and what is expected of them.

e.g: “the workshops will happen over two days. The aim of these workshops is to understand your current and desired involvement in developing or prioritising policies to improve access to quality injury care in [insert country name].

When we say policy, we mean formal plans at local, national, or international levels (e.g. generation of policy documents at a local or national government level, or policy and planning of local healthcare services).

When we say contributing to policy, we mean your involvement in the discussions around development of policy, inputting into the process of drafting formal written policies, or ensuring that formal policies are actioned, etc

We are focussed on finding out about your interactions with policy in general, and not about any specific policies which you think may be useful. Although, in the roundtable discussions, you may wish to think about specific policies to help to orientate the discussion about how you would like to be involved in policy making.”

Pause to ask if there are any questions.

“We invited you today, along with other people who are also (patients/community members/healthcare workers/policy makers – delete as appropriate) because we want to try to come to agreement on your needs and priorities as a group of people. So, whilst you will be contributing to discussions as an individual, by involving multiple people, we will get a more general idea of how others who are similar feel. Therefore, when you are taking part in discussions, please feel free to think about the perceptions of people who you know as well as your own.

The workshop will involve discussion of the whole group (plenary) and breakout discussions (roundtables) with around 5 participants and a facilitator at each table.

During the breakout discussions, the facilitator will pose a question to the group for discussion. Each discussion will orient you to developing a list of e.g.: desires/needs, barriers, and facilitators to being involved in policy processes for improved injury care. Towards the end of the discussion, we would like you to prioritize that list, in order of the biggest priority for your group to the lowest, and think through your reasons for the order of that list.

The facilitator will write down the list.

In the following plenary discussions (where everyone comes together), we ask that a nominated speaker from each breakout group present the group’s top 5 priorities from the list and take questions from the floor about why the order is as presented. This presentation can be done by the facilitator, but it is our preference that this is done by a group member.

At the end of the plenary discussions, when the leaders of the workshops have written down the top five from each group and removed any duplicates, we will ask you to vote for your top 5 priorities from all those that have been presented by all groups. In this way, we aim to get consensus on the priorities for the whole workshop group.

The breakout and general discussions will be audio recorded in case that the research team need to go back and understand a point of discussion. However, we will not be capturing your name or any identifying information on the recordings, and we ask that you try to not identify yourself when speaking in the discussions.

Do you have any questions before we proceed? “

*Please ask participants to move to their allocated tables for further discussions.*

The following guide details the format for each of the sessions/parts, listed in the timetable, above.

PART 1: Needs/desires around involvement in policymaking (ROUNDTABLE 1 / PLENARY 1)

Roundtable 1 (60 mins): Discuss the desires/needs of stakeholders to be involved in developing and prioritising policy solutions to improve equitable access to quality injury care. Facilitators may need to reorient the group to what we mean by ‘policy’, and ‘contributing to policy’, as described above. Facilitators are requested to capture data as follows:

- ensure the audio recorder is switched on
- write down whether the group agreed that they would like to be involved in policymaking
- write down the levels at which the group would like to be involved
- write down their list of priorities (from 1 to n)
- they should also ask group members not to identify themselves in the discussion.

Process:

1. First, invite the group to discuss and agree whether participants wish to be involved in development of policy. Note: the discussion shouldn’t focus on specific policies, but rather explore involvement in policymaking in general.
2. Second, once group has agreed whether they wish to be involved in policy, facilitators explore at what level do they want to contribute (e.g.: local (government policy or healthcare services), national, international, but can be specific to what the group suggest. You should record what the group suggest, NOT what is written in the table for example purposes unless the group suggest these levels)
3. Last, facilitators ask the group to prioritise the levels at which they wish to contribute in order of highest priority (1) to lowest priority (n). When asking the group to prioritise, it will be helpful to ask them to think about and discuss:
4. the feasibility of them being involved at that level;
5. the assumed impact(s) that their involvement at that level would have:

| **Level (focus)** | **Priority** | **Feasibility** | **Impact** |
| --- | --- | --- | --- |
| Local |  |  |  |
| National |  |  |  |
| International |  |  |  |
| Other |  |  |  |

Prompts: There is no need to ask all prompts, these are purely for facilitating discussions, if needed. The prompts are for each stakeholder group:

All:

- What are your experiences of being involved in policy to improve care in general/after injuries?
- Can you think of any ways in which you would like to have more input into the way healthcare services are delivered in general/after injuries?

Patients/community members:

- Have you been involved in any community groups to improve healthcare in general/after injuries?
- Have these been useful?

Healthcare workers:

- Are you involved in developing local hospital policy to improve healthcare services/after injuries?
- How about local district/authority planning to improve services?

Policy makers:

- What is your involvement in making policy or guidelines for improved healthcare in general/after injuries?
- Do you think other stakeholder groups should be involved in assisting with developing policy/guidelines?
- Where do you think policy making for injuries should be best focussed (at the hospital/local authority/national/international level)?
- Which of these levels do you think would most benefit from involvement of other stakeholder groups?

Note that the facilitator should take 15 minutes to assemble the list of priorities to be voted upon before presenting it back to the plenary for voting.

Plenary 1 (45 mins): Each table presents their top 5 priority list of levels at which they wish to be involved to the whole group. Give opportunity after each presentation for whole group discussion around the list that the individual group has presented.

At the end of the group presentations/discussion, the plenary group (all participants) should vote on their top 5 priorities using eMenti or similar.

The top 5 priorities from voting are then presented to plenary group who are oriented to discuss how they would want to contribute to policy being made at these levels in next roundtable (2: mechanisms of involvement).

COFFEE

PART 2: Mechanisms of involvement (ROUNDTABLE 2 / PLENARY 2)

Roundtable 2 (60 mins): How would participants like to contribute to policy, considering the levels which the whole group prioritised in plenary 1. (e.g.: would they like to be involved in advocacy external to policy making, included in local discussions to inform policy and planning, directly included in the policy making process, involved in ensuring official policy is delivered). Facilitators are requested to capture data as follows:

- ensure the audio recorder is switched on
- write down all of the ways in which the group feel they would like to contribute
- write down priority ways in which the group would like to contribute for each level prioritised in plenary 2
- if possible, write down common list of priorities from 1 to n pertaining to all levels prioritized in plenary 2

Process:

1. Facilitators may need to refresh the levels which were prioritised in plenary 1 and ask the group to think about how they would most like to contribute to policymaking at these levels. Ideally the ways in which they would like to contribute are similar for all levels. Facilitators may need to take the group through the discussion level by level and capture (write down) how they would like to be involved for each level.
2. At the end of the discussion, the facilitator should ask the group to prioritise how they would best like to contribute to policy, with them thinking about the following when they create their priority list:
3. the feasibility of them contributing in their chosen way
4. the assumed impact(s) that they think that their contribution will have (e.g.: will their voices be heard)

It is likely to be easier for the group to come up with a priority list for each level and for the facilitator to combine these if they are similar or capture them separately for each prioritized level if there is not a common priority list for all levels. See example of data capture data, below

| **Example level** | **Mechanism (focus)** | **Overall priority*** | **Feasibility** | **Impact** |
| --- | --- | --- | --- | --- |
| Local |  |  |  |  |
| Local |  |  |  |  |
| National |  |  |  |  |
| National |  |  |  |  |
| International |  |  |  |  |
| International |  |  |  |  |
| Other |  |  |  |  |

* the overall priority column should capture the priority of all items in the list, not subdivide this priority order by the level of policy.

Prompts: There is no need to ask all the prompts, these are purely for facilitating discussions, if needed. The prompts are shown for each different stakeholder group:

All:

- Do you think that you would be able to help to influence how the health services are provided or local/national policy to improve care in general/after injuries?
- What would you like to be more involved in/how do you think you could be best involved in influencing how health services are provided or influencing local/national policy to improve care after injuries?

Healthcare workers:

- How do you feel that you could best contribute to influencing policy or local service development?

Policy makers:

- How do you feel that patients/community members/healthcare workers could best contribute to influencing policy or local service development?

Note that the facilitator team should take 15 minutes to assemble the list of prioritise to be voted upon before presenting it back to the plenary for voting.

Plenary 2 (45 mins): Each table presents their top 5 priority list of ways in which they would like to contribute to the whole group. This can be done in total for all levels, or by individual level prioritised in plenary 2. Give opportunity after each presentation for whole group discussion around individual group lists presented.

At the end, the plenary group votes on their top 5 priority ways of being involved (for any level) using eMenti or similar. If the majority of groups have presented their priority list by level, then the voting should be by level. If the majority of groups have presented their priority list for all levels, then the voting should be for all level, with the research team having created a summary list for groups who have done this by level.

Top 5 priorities are presented to plenary group who are then oriented to discuss in the next roundtable barriers to them being involved in policy as at the levels and in the ways that they have prioritized in plenary 2 and 3.

LUNCH

PART 3: Barriers to involvement (ROUNDTABLE 3 / PLENARY 3)

Roundtable 3 (60 mins): What do participants see as barriers to them being involved in the development of policy (at whichever level and however they would like to contribute?

Facilitators are requested to capture data as follows:

- ensure the audio recorder is switched on
- write down all of the barriers mentioned by the group
- write down the priority barriers from 1 (highest priority to n)
- write down any barriers that the group think in general will affect their ability to contribute to policy. These will be used by the research team but not contribute to the voting.

Process:

1. To aid discussions, facilitators may need to refresh the levels prioritised in voting plenary 1 and the priority ways (from voting) in which to contribute from plenary 2.
2. Facilitators should ask the group to think in general about the barriers which they would experience in trying to contribute to those levels and in those ways. We want to find out about general barriers, not ones that are specific to the levels and ways. However, it may assist discussions at the table to ask the group to think about a particular level/way of contributing.
3. Facilitators should orient this discussion towards barriers that may be experienced and not to facilitators to overcome those barriers – those facilitators will be captured in the next session.
4. Facilitators should also write down if the group mention any barriers which are highly specific to a level/way of contributing.
5. At the end of the discussion, the facilitator should ask the group to prioritise the barriers that are going to most likely limit their ability to contribute to policy, with them thinking about the following when they create their priority list:
6. Barriers that are most important to overcome in terms of allowing most contribution to policy
7. The ease in overcoming those barriers
8. Barriers that are most important and easiest to overcome should be highest priority

| **Priority mechanism** | **Barrier (focus)** | **Priority** | **Ease overcoming** |
| --- | --- | --- | --- |
|  |  |  |  |
|  |  |  |  |
|  |  |  |  |

Prompts: There is no need to ask all the prompts, these are purely for facilitating discussions, if needed. The prompts are shown for each different stakeholder group:

All:

- What do you think would limit your ability to be involved in policy making?
- How about policy making at XXXX level or in YYYY way?

Policy makers:

- What do you think are the barriers that would most affect the ability of patients/community members/ healthcare workers being involved in policy?

Note that the facilitator team should take 15 minutes to develop the list of priority barriers from all tables before proceeding to voting.

Plenary 3 (45 mins): Each table summarises their top 5 priority list of the barriers that they think would limit their ability to be involved in policy to the whole group. Give opportunity after each presentation for whole group discussion around the list which the individual group has presented.

At the end of the group presentations/discussion, the group votes on their top 5 priority barriers using eMenti or similar. The group should be reminded that the highest priority barrier is that which is most important to overcome and easiest to overcome and they need to balance these considerations when voting.

The top 5 priority barriers which have been voted for are then presented to plenary group who are oriented to Day 2 on participating in policymaking.

COFFEE

Thank-you

END OF DAY 1

-----------------

DAY 2

Day 2 is less structured than day 1. It will take the roundtable/plenary format, revisiting, verifying and amplifying the outputs from Day 1 but without rounds of voting. The structure and format are intended to support participant involvement and ownership, and participants will be invited to lead discussions where acceptable and appropriate.

Sessions will cover

1. How to support involvement

Based on the re-cap of day one, facilitators will encourage people at individual tables to discuss how they think their involvement in policy making would be best supported.

The plenary sessions will hear from representatives from each round table who will present their group’s consensus on how they feel they would be best supported.

Facilitators will then encourage discussion between all group members to come to consensus on the best method or methods for support.

2. The specific case of whether and how to embed research into policy

Building upon learning around being involved in policy making in general, facilitators will ask individual table groups to think about the need for research informing policy and how research may best be used to inform policy. They will be encouraged to come to consensus around these issues.

In the library session each round table representative will present their groups consensus. That will follow a discussion of members of the whole work-shop to attempt to come to a consensus on whether or how to embed research into policy.

3. Nominating representatives for the multistakeholder involvement workshops in this and subsequent WPs

This will be a free discussion between round tables or larger groups to identify who would like to represent the stakeholder group at multi stakeholder group meetings.

Data capture

Data from these sessions will be primarily captured by taking field notes during the plenary discussions.

Note that a separate member of the research team, one who is not facilitating the sessions, should take field notes.

The roundtable discussions and the plenary sessions will be recorded in case clarity is later needed. It is not the intention to fully analyse these recordings. The recordings will be destroyed once the write-up from these sessions is complete

### APPENIX 3 – interview guide with policymakers

Interview guide with policymakers

(in case a quorum is not reached to allow a workshop to proceed)

NIHR Global Health Group on Equitable Access to Quality Health Care for Injured People in Four Low or Middle Income Countries: Equi-injury

**Individual interviews with policy makers: topic guide. Version 0.1. 22.02.2022** (note this is a discussion guide, the research assistants running the study will be fluent in English and local languages, and will translate discussion points, where needed, for participants)

Introductions

Introduction of researcher

Reminder of study (interviewee will have received participant information sheet and signed consent form)

Confirmation that participant is happy to proceed

Explanation of what happens to the data

*Switch the Dictaphone on*

- Tell me about your work role in relation to designing policy to improve healthcare after injuries
- At what sort of level is your policy work centred

E.g – developing international, regional, national, or local policy

- Can you tell me about the process of designing policy, in your experience?

Probe:

If you have had experience of designing policy at different levels, does the process differ much?

- In general, do you think the current way of developing or improving policy is useful or could be improved upon?

Probe: if respondent states it is useful or could be improved upon ask why or how?

- What in your opinion would lead to the greatest chance of success of a policy?
- What information do you use in designing or redesigning policy?

Probe:

e.g: results of research

e.g: media reports

e.g: information from WHO

- What do you think is the most useful information to assist you in designing/redesigning a policy?

Probe:

What do you think could be most useful in showing where policy needs to be improved or designed?

- Are there barriers to use of external sources of information in policy?

Probe – if so, what are these?

- What about research?

– do you think that results of research are important in prioritising what policies to develop in general and specifically for injuries?

- in your experience, are results of local or other research used when developing policies specifically and for injuries

- in your opinion should the findings of research be used more or less in the development of policies generally and specifically for injuries

- When discussing developing or improving policy who is usually involved?

Probe:

Is this usually limited to policy makers?

Are community members or patients ever involved?

Probe – if yes – do you feel that these groups are currently involved to the right amount or do you think that more or less could be done to involve them?

Probe – if they respond that more could be done – ask what they think would be helpful to engage them more?

- Do you think that involvement of people who are not familiar with making policy as part of their usual work-roles is useful or not?

Probe – if respondent thinks it could be useful to involve non policy makers ask:

How do you think it would be most useful to get their involvement?

Who do you think would be best involved (e.g: patients, community members, healthcare workers)?

What do you think are the barriers to involving non-policy makers in making policy

Close of interview

Thank you.

*Switch the Dictaphone off*

Any questions from interviewee. Reminder of study contact details.

###

### APPENDIX 4 – RREAL sheets

#### RREAL Sheet 1: Workshops and Interviews

Facilitators and interviewers take notes during each data collection activity. The teams’ notes are quickly recorded into to one RREAL sheet per workshop/IDI, which contains a column, per workshop on the information being collected (on levels, mechanisms barriers and facilitators to stakeholder engagement). In RREAL Sheet 1, the outputs from the voting should be recorded, together with researcher reflections.

| Site |  |  |  |  |  |
| --- | --- | --- | --- | --- | --- |
| Workshop/Interview | Workshop 1 | 2 | 3 | 4 | 5 🡪 |
| Date/recorded by |  |  |  |  |  |
| Information: Main categories of information for the study (derived from RQs, interview guide, analytical framework etc.) | Summary of findings as they are collected and generated |  |  |  |  |
| Overall summary |  |  |  |  |  |
| 1. **Levels of involvement. What were the top ranked levels captured through voting?** Is involvement wanted? Is it needed? Is it possible/feasible? Current status of involvement? |  |  |  |  |  |
| 2. **Mechanisms of involvement. What were the top ranked mechanisms captured through voting?** How can people be involved in policy? Through what processes and mechanisms? In which spaces and contexts, when, where, with whom and how? |  |  |  |  |  |
| 3. **Barriers to involvement. What were the top ranked barriers captured through voting?** What stops people being involved, considering it is wanted and needed? What do barriers reflect? |  |  |  |  |  |
| 4. **Facilitators of involvement . What were the top ranked facilitators captured through voting?** How can barriers be overcome? What needs to be addressed by whom, where, when and how? |  |  |  |  |  |
| 5. Multi stakeholder engagement. Interest to ongoing involvement and convening of consultative panel together with health care workers and managers, planners and other policy and decision makers. |  |  |  |  |  |
| 6. Next steps. Record any reflections on next steps discussed |  |  |  |  |  |

#### RREAL Sheet 2: Researcher Observations/Reflections

| Site |  |  |  |  |  |
| --- | --- | --- | --- | --- | --- |
| Interview/workshop | Workshop 1 | 2 | 3 | 4 | 5 🡪 |
| Date/recorded by |  |  |  |  |  |
| Information: Main categories of information for the study (derived from RQs, interview guide, analytical framework etc.) | Summary of findings as they are collected and generated |  |  |  |  |
| Overall summary |  |  |  |  |  |
| Dynamics in discussions. What worked well? What was challenging? Who participated more and less?  Workshops - Extent of discussion, whether all (or just a select few) participants involved, whether agreement quickly reached or difficult to achieve |  |  |  |  |  |
| Lessons learned |  |  |  |  |  |
| Things we will do differently |  |  |  |  |  |
| Areas of good practice |  |  |  |  |  |
| Training needs |  |  |  |  |  |
| Any additional comments, reflections, observations |  |  |  |  |  |

APPENDIX 5 – Priority areas across four study counties

5.1. Levels of engagement

|  | Rank | Patient | | Health worker | | Policy maker |
| --- | --- | --- | --- | --- | --- | --- |
|  | Urban | Rural | Urban | Rural |
| Ghana | 1 | **National**  (e.g. Ministry of Health) | **Community**  (lowest level of organization, e.g. villages, community groups) | **Local community** (lowest level of organization) | **Local community** (lowest level of organization) | **National**  (e.g. Ministry of Health) |
|  | 2 | **Regional** (administrative unit of management, supra-district) | **District**  (formal, administrative, statuary) | **District**  (formal, administrative, statuary) | **District**  (formal, administrative, statuary) | **Regional** (administrative unit of management, supra-district) |
|  | 3 | **Local community** (lowest level) | **Regional** (administrative unit of management, supra-district) | **Regional** (administrative unit of management, supra-district) | **Regional** (administrative unit of management, supra-district) | **District**  (formal, administrative, statuary) |
|  | 4 | **District**  (formal, administrative, statuary level) | **National**  (e.g. Ministry of Health) | **National**  (e.g. Ministry of Health) | **National**  (e.g. Ministry of Health) | **Local**  (lowest level) |
|  | 5 | **International**  (development partners, e.g. WHO) | **International**  (development partners, e.g. WHO) | **International**  (development partners, e.g. WHO) | **International**  (development partners, e.g. WHO) | **International**  (development partners, e.g. WHO) |
|  |  |  |  |  |  |  |
|  | Rank | Patient | | Health worker | | Policy maker |
|  | Urban | Rural | Urban | Rural |
| Pakistan | 1 | **Local community** (grassroot level, where people live) | **Local community** (grassroot level, where people live) | **Emergency Department**  (where HCWs work and deliver care) | **Emergency Department**  (where HCWs work and deliver care) | **Hospital**  (senior management, CEO) |
|  | 2 | **National**  (provinces coming together) | **National**  (provinces coming together) | **Hospital**  (senior management, CEO) | **Hospital**  (senior management, CEO) | **Provincial**  (provincial government level) |
|  | 3 | **International** (global level, e.g. NGOs) | **International** (global level, e.g. NGOs) | **Local community**  (grassroot level, where people live) | **Local community**  (grassroot, where people live) | **Local community** (grassroot, where people live) |
|  | 4 | **District** (municipality level to feed up) |  | **National**  (provinces coming together) | N**ational**  (provinces coming together) | **National**  (provinces coming together) |
|  | 5 | **Minority groups** (refugees, transgender, groups not always formally recognised) |  |  | **District**  (municipality level to feed up) | **International** (global level, NGOs) |
|  |  |  |  |  |  |  |
|  | Rank | Patient | | Health worker | | Policy maker |
|  | Urban | Rural | Urban | Rural |
| Rwanda | 1 | **Local authorities** (administrative level ofvillages,cells, sectors) | **Local**  (school, villages, health centres) | **National**  (referral and teaching hospitals) | **District hospitals** | **National**  (Ministry of Health) |
|  | 2 | **National**  (Ministry of Health) | **Private sector**  (e.g. private healthcare providers) | **National**  (Ministry of Health) | **National**  (Ministry of Health) | **National**  (referral and teaching hospitals) |
|  | 3 | **National**  (National Police, Department of Traffic & Road Safety) | **National**  (Ministry of Health) | **National**  (insurance companies) | **National**  (referral & teaching hospitals) | **Local**  (school, villages, health centres) |
|  | 4 | **National** (Parliament) | **National** (Parliament) | **Local**  (school, villages, health centres) | **International** (NGOs, UN, civil society) | **International** (NGOs, UN, civil society) |
|  | 5 | **International** (NGOs, UN, civil society) | **International** (NGOs, UN, civil society) | **International** (NGOs, UN, civil society) | **Local**  (school, villages, health centres) | **National**  (Emergency Medical Services (EMS) Division/SAMU (Service d'Aide Médicale d'Urgence, Rwanda Biomedical Center) |
|  |  |  |  |  |  |  |
|  | Rank | Patient | | Health worker | | Policy maker |
|  | Urban | Rural | Urban | Rural |
| South Africa | 1 | **Local community**  (lay people coming together) | **Local community**  (lay people coming together) | **District** (responsible for delivery of health care) | **Local**  (local workplaces) | **Provincial**  (Department of Health) |
|  | 2 | **Local government** (municipality) | **Grassroots** (subgroup of community) | **Multidisciplinary teams & patients** | **Local community**  (lay people coming together) | **National** |
|  | 3 | **Grassroots** (subgroup of community) | **Civil society**  (NGOs, faith-based groups) | **Local community**  (lay people coming together) | **Regional**  (bringing districts together) | **Local community**  (lay people coming together) |
|  | 4 | **Civil society**  (NGOs, faith-based groups) | **Health committees** | **Regional**  (bringing districts together) | **District** (responsible for delivery of health care) | **District** (responsible for delivery of health care) |
|  | 5 | **Provincial**  (Department of Health) | **Provincial**  (Department of Health) | **Provincial**  (Department of Health) | **Provincial**  (Department of Health) | **Regional**  (bringing districts together) |
|  |  |  |  |  |  |  |

5.2. Mechanisms of engagement

|  | Rank | Patient | | Health worker | | Policy maker |
| --- | --- | --- | --- | --- | --- | --- |
|  | Urban | Rural | Urban | Rural |
| Ghana | 1 | **Community engagement**  (people gather with community leaders and exchange on policy needs and priorities) | **Community events** (events where people gather with community leaders and exchange on policy needs and priorities) | **Research (audits, case reports)**  (engaging in research to contribute evidence for policy making, organising workshops to train) | **Community engagement (local community events)**  (people gather with community leaders and exchange on policy needs and priorities) | **Research (community-based)**  (prepare reports/information generated from community and escalated/forwarded to national level) |
|  | 2 | **Political campaigns**  (engaging local politicians and community members with connection to higher policy levels) | **Local media**  (engaging with local media to provide and receive information, e.g. local radio and TV, exists) | **Community engagement (local events)**  people gather with community leaders and exchange on policy needs and priorities) | **Local media**  (engaging with local media to provide and receive information, e.g. local radio and TV, exists) | **Policy development**  (attending policy making meetings or disseminating information used in these meetings) |
|  | 3 | **Local media**  (engaging with local media to provide and receive information, e.g. local radio and TV) | **Faith-based groups and leaders**  (engaging with religious organisations and leaders on policy needs and priorities) | **Clinical engagement**  (through conferences, seminars and workshops as key platform) | **Research (conferences, workshops)**  (engaging in research to contribute evidence for policy making, organising workshops to train) | **Community engagement (events)**  (engaging with community members and leaders) |
|  | 4 | **Research (workshops, conferences)**  (through workshops and conferences; organising training sessions to educate healthcare providers and community members) | **Officials at household level**  (engaging in house-to-house visitation from officials to give/receive information and community members themselves conducting visitations) | **Multisectoral engagement**  (partnerships with agents of change to communicate policy needs and priorities) |  | **Research (administrative/service based**)  (Accessing and using information from various sources, service/administrative data, media, community members, research, WHO) |
|  | 5 |  |  |  |  |  |
|  |  |  |  |  |  |  |
|  | Rank | Patient | | Health worker | | Policy maker |
|  | Urban | Rural | Urban | Rural |
| Pakistan | 1 | **Community awareness**  (raising awareness through social media, banners, local discussions in panchayat) | **Community awareness**  (raising through social media, banners, local discussions in panchayat) | **Policy implementation** (implementing policies related to injury) | **Policy implementation**  (implementing policies related to injury) | **Policy development**  (Need assessment & gap assessment- Identification of demands and requirements that exist and evaluating current practices and assessing expected outcomes, using international guidelines) |
|  | 2 | **Policy implementation**  (implementing policies related to injury) | **Policy implementation**  (implementing policies related to injury) | **Community engagement** (engaging with leaders, authorities, lords) | **Community awareness**  (raising through social media, banners, local discussions in panchayat) | **Multisectoral engagement**  (policy makers, healthcare professionals, researchers, community representatives, advocacy groups and patients working together) |
|  | 3 |  | **Community engagement**  (engaging with leaders/authorities (e.g. feudal lords, religious and spiritual leaders, teachers, traditional healers and local government administrators, | **Community awareness**  (through social media, awareness campaigns, banners, local discussions in panchayat, injury care support groups, door to door) | **Community engagement**  (engaging with feudal lords, religious and spiritual leaders, teachers, traditional healers and local government administrators) | **Research**  (importance of research for designing effective guidelines and policies) |
|  | 4 |  |  |  | **Research**  (contributing to research for designing effective guidelines and policies) | **Data**  (evidence-based, data driven) |
|  | 5 |  |  |  |  | **Monitoring and evaluation**  (of policy dissemination and implementation) |
|  |  |  |  |  |  |  |
|  | Rank | Patient | | Health worker | | Policy maker |
|  | Urban | Rural | Urban | Rural |
| Rwanda | 1 | **Policy development**  (involved in developing policy) | **Advocacy**  (through multiple mechanisms) | **Data**  (providing data through research) | **Guideline development**  **(involved in formulating guidelines)** | **Multisectoral engagement**  (collaboration between professional associations, implementers, academic institutions, civil society, patients, WHO, HCWs) |
|  | 2 | **Data**  (providing data or information for policy input) |  | **Advocacy**  (through multiple mechanisms) | **Data**  (providing data through research) | **Data**  (provision of data, use of data) |
|  | 3 | **Advocacy**  (through multiple mechanisms) |  | **Policy development**  (involved in developing policy, consulted in policy development) | **Advocacy**  (through multiple mechanisms) | **Advocacy**  (through public campaigns) |
|  | 4 |  |  |  |  | **Community engagement**  (engaging community and community leaders) |
|  | 5 |  |  |  |  | **Technical support for policy development**  (leading and providing technical support for policy and guideline development) |
|  |  |  |  |  |  |  |
|  | Rank | Patient | | Health worker | | Policy maker |
|  | Urban | Rural | Urban | Rural |
| South Africa | 1 | **Community awareness** (mobilising community through information) | **Protests**  (silent marches, petitions) | **Health worker alliances**  (building alliances around better data management and sharing) | **Existing platforms** (building alliances between HCs) | **Policy development** |
|  | 2 | **Multisectoral engagement**  (formation of and participation in multistakeholderaction) | **Local participation** (e.g. local forums and boards) | **Multisectoral engagement**  (formation of and participation in multistakeholderaction) | **CYP engagement**  (empowering and engaging children and young people to be involved in policy making) | **Research**  (evidence-based policy development, local and international research) |
|  | 3 | **Local participation** (e.g. advisory boards) | **Existing platforms** (governance/health, e.g. participating in community healthcare boards, SCOPA) |  | **Existing platforms** (governance/health, e.g. participating in hospital governance structures) | **Multisectoral engagement**  (formation of and participation in multistakeholderaction) |
|  | 4 | **Existing platforms** (radio/church) |  |  | **Multisectoral engagement**  (formation of and participation in multistakeholderaction) | **Existing platforms** (governance/health boards) |
|  | 5 |  |  |  |  | **Existing platforms** **(HCs)**  (e.g. health boards) |

5.3. Barriers to engagement

|  | Rank | Patient | | Health worker | | Policy maker |
| --- | --- | --- | --- | --- | --- | --- |
|  | Urban | Rural | Urban | Rural |
| Ghana | 1 | **Discrimination**  (discrimination based on personal characteristics, tribe, religion, political affiliation) | **Resources**  (lack of resources and infrastructure to get involved) | **Resources**  (lack of resources and infrastructure to get involved) | **Discrimination**  (discrimination based on personal characteristics, tribe, religion, political affiliation) | **Resources**  (lack of resources and infrastructure to get involved) |
|  | 2 | **Education**  (lack of education to get involved)) | **Education**  (lack of education to get involved) | **Bureaucracy**  (issues to do with administration and processes for policymaking) | **Resources**  (lack of resources and infrastructure to get involved) | **Data**  (lack of data, not knowing where to look for evidence-based data) |
|  | 3 | **Resources**  (lack of resources and infrastructure to get involved) | **Communication**  (language barriers, barriers to do with different spoken languages, lack of interpreters) | **Participation**  (lack of engagement with community members) | **Data**  (lack of data, not knowing where to look for evidence-based data) | **Knowledge (policymakers)**  (lack of knowledge amongst other stakholders to get engaged) |
|  | 4 | **Communication**  (barriers to do with different spoken languages, lack of interpreters) | **Discrimination**  (discrimination based on personal characteristics, tribe, religion, political affiliation) | **Discrimination**  (discrimination based on personal characteristics, tribe, religion, political affiliation) | **Bureaucracy**  (issues to do with administration and processes for policymaking) | **Discrimination**  (discrimination based on personal characteristics, tribe, religion, political affiliation) |
|  | 5 | **Security**  (lack of security, fear of authority) | **Hierarchies**  (organisational hierarchies and challenges) | **Research capacity (health workers)** |  | **Time (community)**  (lack of time amongst the community to get involved) |
|  |  |  |  |  |  |  |
|  | Rank | Patient | | Health worker | | Policy maker |
|  | Urban | Rural | Urban | Rural |
| Pakistan | 1 | **Infrastructure**  (lack of transportation, human resources) | **Funds**  (lack of resources for engagement and training) | **Funds**  (lack of resources for engagement and training) | **Infrastructure**  (lack of transportation, human resources and logistics) | **Bureaucracy**  (systemic issues, inflexible policy processes, lengthy approval process) |
|  | 2 | **Funds**  (lack of resources for engagement and training) | **Skills** (**health workers)**  (lack of skills amongst health care workers for policy engagement) | **Infrastructure**  (lack of transportation, human resources and logistics) | **Funds**  (lack of resources for engagement and training) | **Political will**  (lack of buy-in from policymakers) |
|  | 3 | **Accountability**  (lack of transparency and trust) | **Skills (community)**  (lack of skills amongst the community for policy engagement) | **Skills (health workers)**  (lack of skills amongst health care workers for policy engagement) | **Skills (health workers)**  (lack of skills amongst health care workers for policy engagement) | **Infrastructure**  (lack of transportation, human resources, logistics) |
|  | 4 | **Skills**  **(health workers)**  (lack of skills amongst health care workers for policy engagement) | **Infrastructure**  (lack of transportation, human resources) | **Security**  (lack of security and safety, fear of getting engaged) | **Gov't support**  (lack of government support for HCWs to be engaged) | **Funds**  (lack of resources for engagement and training) |
|  | 5 | **Skills (community)**  (lack of skills amongst the community for policy engagement | **Security**  (lack of security and safety, fear of getting engaged) |  | **Time**  (lack of time due to the professional responsibilities) | **Research**  (lack of evidence-based research) |
|  |  |  |  |  |  |  |
|  | Rank | Patient | | Health worker | | Policy maker |
|  | Urban | Rural | Urban | Rural |
| Rwanda | 1 | **Funds**  (lack of financial resources, economic hardship) | **Funds**  (lack of financial resources, economic hardship) | **Funds**  (lack of financial resources) | **Funds**  (lack of financial resources) | **Research**  (lack of a common database at a national and/or international level and lack of integrated data to facilitate access to information to guide policy development) |
|  | 2 | **Transport**  (lack of transport infrastructure, especially for those who live in remote areas) | **Confidence**  (lack of confidence/motivation/  self-expression) |  | **Knowledge/ awareness**  (inadequate expertise or knowledge to engage) | **Data**  (lack of local data) |
|  | 3 | **Education**  (low level of education, low literacy) | **Participation**  (limited participation in community meetings) |  | **Interest**  (ideas from HCWs overlooked by decision-makers) | **Involvement in research**  (limited involvement in health data collection, reporting and quality from HCWs) |
|  | 4 | **Knowledge/ awareness**  (lack of awareness on processes) | **Transport**  (lack of transport infrastructure) |  |  | **Knowledge/ awareness**  (limited knowledge, skills) |
|  | 5 |  |  |  |  | **Participation**  (lack of community involvement) |
|  |  |  |  |  |  |  |
|  | Rank | Patient | | Health worker | | Policy maker |
|  | Urban | Rural | Urban | Rural |
| South Africa | 1 | **Hierarchies**  (social hierarchies) | **Skills**  (lack of confidence, skills, illiteracy) | **Hierarchies**  (social and professional hierarchies) | **Commitment**  (lack of support/commitment from hospital leadership) | **Hierarchies**  (social and professional hierarchies) |
|  | 2 | **Security**  (lack of safety, organized crime) | **Receptivity (health officials)**  (negative attitudes of officials towards involvement of other stakeholders) | **Time**  (time constraints due to clinical duties) | **Consensus**  **(**lack of consensus on issues, differing interests at higher levels of management) | **Power imbalances** |
|  | 3 | **Interest**  (low interest and lack of community participation) | **Staff**  (lack of staff in clinics) | **Accountability**  (lack of accountability, governance) | **Interest**  (lack of interest in getting involved) | **Interest**  (lack of interest to get involved) |
|  | 4 |  | **Communication**  (complex language and ways of communicating) | **Commitment**  (lack of support/commitment from hospital leadership) |  | **Resources**  (lack of resources) |
|  | 5 |  |  |  |  | **Awareness (health workers)**  (lack of awareness amongst HCWs on how to get involved) |

5.4. Facilitators to engagement

|  | Rank | Patient | | Health worker | | Policy maker |
| --- | --- | --- | --- | --- | --- | --- |
|  | Urban | Rural | Urban | Rural |
| Ghana | 1 | **Funding**  (provision of financial resources, support to pay for transport to meetings, remuneration for time and effort) | **Funding**  (provision of financial resources, support to pay for transport to meetings, remuneration for time and effort) | **Funding**  (provision of financial resources, support to pay for transport to meetings, remuneration for time and effort) | **Training / networks**  (providing in-service training, capacity building to equip HCWs to be involved in policymaking) | **Political will**  (political will and commitment from the government) |
|  | 2 | **Training / networks**  (encouragement and training, mentoring includes formal and informal) | **Time/recognition**  recognition of lived experience; remuneration for input/time) | **Infrastructure**  (platform for policy engagement, spaces and processes) | **Funding**  (provision of financial resources, support to pay for transport to meetings, remuneration for time and effort) | **Funding**  (provision of financial resources, support to pay for transport to meetings, remuneration for time and effort) |
|  | 3 | **Inclusion**  **creating an equal (**opportunity for engagement and allowing all stakeholders to be duly represented | **Infrastructure**  (platforms for involvement) | **Multistakeholder engagement**  (involvement of diverse stakeholders, e.g. service users, providers and higher-level officials, NGOs, development partners) | **Networks**  (knowing persons who can and will recommend you to policymaking platforms) | **Research**  (existence relevant research, use of research) |
|  | 4 | **Non-discrimination**  (avoiding discrimination based on gender, ethnicity, etc) | **Training / networks**  (knowing persons who can and will recommend you to policymaking platforms) | **Training / networks**  (knowing persons who can and will recommend you to policymaking platforms) | **Time/recognition**  (recognition of service; remuneration for input/engagement and being delegated duties as avenues to step into the policy-making arena) | **Community engagement**  (engagement of the community and community leaders) |
|  | 5 | **Communication**  (availability of interpreters) | **Communication**  (availability of interpreters) | **Media**  (use of media e.g. TV Radio, Newspapers to communicate policy needs and priorities) | **Networks**  (opportunities to engage with higher level actors and officials) | **Training / networks**  Training for all stakeholders to understand the policy processes) |
|  |  |  |  |  |  |  |
|  | Rank | Patient | | Health worker | | Policy maker |
|  | Urban | Rural | Urban | Rural |
| Pakistan | 1 | **Funding**  (funding support from government and NGOs to support pt and community involvement) | **Funding**  (funding support from government and NGOs to support pt and community involvement) | **Funding**  (funding support from government and NGOs to support involvement) | **Funding**  (funding support from government and NGOs to support involvement) | **Stakeholder involvement**  (stakeholder involvement and buy-in) |
|  | 2 | **Time/recognition**  (personal recognition and time compensation for pts and community members) | **Transport**  (provision of transport for pts and community members) | **Transport**  (provision of transport for pts and community members) | **Engagement (community/political)**  (engagement of local community and political leaders) | **Evidence**  (adopting an evidence-based approach) |
|  | 3 | **Media**  (transparent, active and participatory media to support pts and community members being involved) | **Trainers**  (provision of skilled trainers to support pt and community involvement) | **Engagement (community/political)**  (engagement of local community and political leaders) | **Transport**  (provision of transport for pts and community members) | **Funding**  (allocation of resources for involvement) |
|  | 4 | **Transport**  (provision of transport for pts and community members) | **Time/recognition**  (personal recognition and time compensation for pts and community members) | **Inclusion**  (gender, cultural, ethnicity, religious inclusion in policy formation, implementation and dissemination) | **Time/recognition**  (personal recognition and time compensation for pts and community members) | **Input to existing policies**  (strengthening existing policy processes) |
|  | 5 |  |  | **Time/recognition**  (personal recognition and time compensation for pts and community members) |  | **M&E policy implementation**  (regular audits) |
|  |  |  |  |  |  |  |
|  | Rank | Patient | | Health worker | | Policy maker |
|  | Urban | Rural | Urban | Rural |
| Rwanda | 1 | **Resources**  (support and resources) | **Good governance** | **Security**  (feeling safe to be able to get involved) | **Technology**  (availability of and access to technology, e.g. toll-free call, and SMS text) | **Community engagement**  (community involvement in acquiring information and generating solutions) |
|  | 2 | **Good governance** | **Technology**  (availability of and access to technology, e.g. toll-free call, and SMS text) | **Political will** | **Social media**  (WhatsApp, Twitter/X, Instagram) | **Multistakeholder engagement**  (with local and international participation) |
|  | 3 |  | **Basic education** | **Basic education** | **Good governance** | **Data**  (use of quality data to guide decisions and use of trustworthy institutions to provide quality data) |
|  | 4 |  | **Security**  (feeling safe to be able to get involved) | **Community engagement**  (community members, CHWs working in the community) | **Media**  (radio broadcasts, programme called "voice of patient" or IJWI RY'UMURWAYI”) | **Information**  (minimum level of information/capacity to understand the issue being addressed) |
|  | 5 |  | **Health insurance**  (having active insurance) | **Infrastructure**  (inclusive conference venues/roads/ facilities) | **Suggestion boxes**  (e.g. in hospitals, clinics) | **Learning and exchange**  (from successful stories, existing processes) |
|  |  |  |  |  |  |  |
|  | Rank | Patient | | Health worker | | Policy maker |
|  | Urban | Rural | Urban | Rural |
| South Africa | 1 | **Multistakeholder engagement**  (patients, HCWs, policymakers working together) | **Health committees**  (clinics that are open to everyone) | **Communication (health workers)**  (inclusive and open communication between HCWs and officials to support involvement) | **Multistakeholder engagement**  (patients, HCWs, policymakers working together) | **Community engagement**  (engaging with the community and community leaders) |
|  | 2 | **Inclusion**  (being open and inclusive of people with disability to be involved in policy) | **Indigenous healers**  **(**collaboration of indigenous knowledge healers and health practitioners  to elevate community voice into policy) | **Leadership**  (openness and willingness of higher management to include issues that are of concern to HCWs) | **Leadership**  (openness and willingness of higher management to include issues that are of concern to HCWs) | **Multistakeholder engagement**  (patients, HCWs, policymakers working together) |
|  | 3 | **Health committees**  (connection of members of clinic committees to policy) | **CYP education**  (education for children and youth to develop skills for policy involvement) |  | **M&E policy implementation**  (consistent evaluation and implementation of policies and guidelines) | **Research**  (available research and evidence) |
|  | 4 |  |  |  |  |  |
|  | 5 |  |  |  |  |  |
